# Supplementary material for: A Novel Reference Plasmid for the Qualitative Detection of Genetically Modified Rice in Food and Feed
Source: Biomed Res Int. 2015 Sep 30;2015:948297. doi: 10.1155/2015/948297 (PMC4606087; doi:10.1155/2015/948297)
Supplement: Supplementary file 1 — Supplementary Table S1: The investigation results of the status of genetically modified rice in China from 1989 to 2014. We show the total list of papers published on development of GM rice varieties is approximately 250. [file 948297.f1.xlsx]

## Sheet: Table S1
Supplementary Table. S1
		Exogenous Genes													References													Years
	35S	NOS	HPT	Ubi	GUS	Bar	P-actin	P-nos	NPTII	Others
		+								P-PG-5α	IPT				Development of Transgenic Rice Lines Introduced fla subtilis and Their Resistant Spectrum AnalysisGene from Bacillus								转fla基因水稻的育成及抗病谱分析	Molecular Plant Breeding, 2015, 13 (1): 61-65				2015
	+	+								mG2-epsps					Generation of Glyphosateresistant Transgenic Rice Harboring Single Copy of 2mG2epsps Gene by Clean DNA Transformation								洁净DNA转化获得2mG2-epsps基因单拷贝整合的抗草甘膦水稻	Chinese Journal of Rice Science, 2014, 28 (1): 15-22
	+	+								SiPEBP					Expression Vector Construction and genetic Transformation of Antifreeze SiPEBP gene in Rice								抗寒SiPEBP基因表达载体构建及转化水稻的研究	Xinjiang Agricultural Sciences, 2013, 50 (9): 1591-1597
										OsGL1-5					Expression Pattern and Stress Responses of Wax Biosynthesis Related Gene OsGL1-5 in rice								水稻蜡质合成相关基因OsGL1-5的表达模式及逆境响应特征分析	Journal of Nudear Agricultural Sciences, 2013, 27 (7): 0938-0945
										rd29A	ICE1				Integratting Cold Regulative Gene rd29A-ICE1 into Rice Improves Cold Tolerance								转rd29A-ICE1冷诱导基因水稻提高抗寒性研究	Journal of Nudear Agricultural Sciences, 2013, 27 (6): 0731-0735
	+	+		+		+				Cry2Aa					Development of An Insect-resistant and Herbicide-Transgenic Restorer Line B2A68 in Rice resistant								抗虫抗除草剂转基因水稻恢复系B2A68的培育	Hybrid Rice, 2013, 28 (1): 63-67
	+	+	+							OsCER4					Acquisition of Wax Biosynthesis Related Gene OsCER4 Transgenic Plants by the Cognate Promoter Antisense-RNA								水稻蜡质合成相关基因OsCER4自身启动子驱动的反义RNA转化植株获得	Journal of South China Agriculutural University, 2013, 34 (1), 51-56
	+		+	+						GFP	pAct1	Bt			Investigation of Regeneration and Transformation Frequencies Generated from Different Genotypes in Rice (Oryza sativa L．)								水稻不同品种组培再生和转基因频率研究	Journal of Nudear Agricultural Sciences, 2013, 27 (12): 1817-1827
	+	+				+				Rbcs3	Cry1Ac1				Comparative Analysis of the Proteomic and Nutritional Composition of Transgenic Rice Seeds with Cry1ab/ac Genes and Their non-transgenic Counterparts								转cry1Ac1基因抗虫水稻的培育	Molecular Plant Breeding, 2014, 12 (6): 1103-1111
	+	+		+			+		+	Ns2	NS3				Construction of Rice Stripe Virus NS2 and NS3 Co-RNAi Transgenic Rice and Disease-resistance Analysis								水稻条纹病毒NS2和NS3基因共干扰转基因水稻的培育及抗病性分析	Chinese Journal of Virology, 2014, 30 (6): 661-667
	+	+	+							osBTF3					Generation and Molecular Identification of Transgenic Rice Lines with Overexpressed OsBTF3 Gene								OsBTF3过表达转基因水稻株系的创制及其分子鉴定	Current Biotechnology, 2012, 2 (1): 39-43
	+		+							AtVIP1					Construction of OsVIP1 RNAi transgenic rice plants								OsVIP1RNAi转基因水稻植株的构建	Journal of Huazhong Agricultural University, 2012, 31 (2): 152-158
	+		+	+						mCherry	rbcs				Genetic Analysis of mCherry Transgenic Rice and Molecular Characterization of T-DNA Integration Sites in the Rice Genome								转mCherry基因水稻的遗传分析及T-DNA整合位点的研究	Molecular Plant Breeding, 2012, 10 (2): 121-130				2012
		+	+							GluA3	Waxy				Over-expression of Waxy Gene on Rice Mediated by Agrobacterium								农杆菌介导的水稻Waxy基因过量表达初步研究	Chinese Journal of Tropical Crops, 2012, 33 (3): 453-458				2012
		+								Rubisco	Cry1Ab				Molecular characteristics and specific PCR detection of transgenic rice containing Cry1Ab								转Cry1Ab基因水稻分子特征及其特异性PCR检测方法	Hereditas (Beijing), 2012 ,2 , 34 (2): 208-214				2012
				+						NPR1	G418				Agronomic traits and rice bacterial blight disease resistance in T3 generation lines of rice cultivar 253 over-expressing Arabidopsis thaliana NPR1 gene								转拟南芥NPR1基因水稻253 T3代株系对水稻白叶枯病的抗性及其农艺性状表现	Journal of South Agriculutural, 2012, 43 (4): 417-420				2012
	+	+	+							OsHPT					Increase of Tocopherol Content in Endosperm by Overexpression of Homogentisate Phytyltransferase in Transgenic Rice								转基因水稻中过量表达OsHPT提高胚乳中生育酚含量	Molecular Plant Breeding, 2012, 10 (5): 528-534				2012
	+	+			+			+	+	hrfAxoo					Transformation of rice with hrfAXoo gene and resistance of transgenic plants to bacterial leaf blight								转hrfAxoo基因水稻对白叶枯病的抗性	Journal of Nanjing Agricultural University, 2004, 17 (4); 36-40				2012
	+	+	+							SBE3	wx				Effects of Overexpression of Wx gene and RNA Interference of SBE3 Gene Compound Expression on Amylose Content in Rice								复合调控Wx与SBE3基因对水稻籽粒直链淀粉含量的影响	Acta Laser Biology Sinica, 2012, 21 (1): 16-21				2012
	+	+	+		+					AtNHXS1					Overexpression of a shuffled Na+/H+ antiporter gene AtNHXS1 improving salt tolerance of rice (Oryza sativa L.)								过量表达AtNHXS1新基因显著提高水稻的耐盐性	Journal of Huazhong Agriculture University, 2012, 31 (5): 529-535				2012
	+									OsPK1					Generation and Characterization of Overexpression Lines of a Rice Pyruvate Kinase Gene OsPK1								水稻丙酮酸激酶基因OsPK1的过表达转基因株系的获得与鉴定	Acta Agriculture Boreali-Sinica, 2012, 27 (2): 1-5				2012
	+									nad5					Construction and genetic transformation of over-expression vector of nad5 genes in rice								水稻线粒体nad5基因超表达载体的构建和遗传转化	Guangdong Agricultural Sciences, 2012, 39 (12): 1-7				2012
			+							OsVP1P	SlABI3				Embyo-Specific Expression of Tomato S/AB/3 Results in Inhibition of Preharvest Sprouting in G46B of Rice								种胚特异性表达番茄SlABI3对水稻冈46B穗萌的抗性研究	Scientia Agricultura Sinica, 2012, 15 (45): 3020-3028				2012
	+	+		+		+				Cry1Ca					Development and Character Identification of Rice Transformed by Cry1Ca and Bar Gene								转Cry1Ca和Bar基因水稻的获得与性状鉴定	Research of Agriculture Modernization, 2012, 33 (1): 104-107				2012
				+		+				OsbHLH1					Transgenic Rice with Bar and OsbHLH1 Genes and Its Agronomic Trait Analyses								转OsbHLH1和Bar基因水稻及相关特性分析	Journal of Agricultural Biotechnology, 2012, 20 (1): 30-37				2012
	+	+	+	+	+					GMM					Transgenic Rice Plants to Improve Resistance of Sheath Blight								抗纹枯病转基因水稻植株的创制	Master Dissertation, Fujian Agriculture and Frestry University, 2011				2011
	+	+	+							OsUgp2	otsAB				Co-expression of OsUgp2 and otsAB in Rice Increasing Its Resistance to Drought and Cold Stresses								OsUgp2和otsAB基因共转化增强水稻抗旱抗寒能力	Genomics and Applied Biology, 2011, 30 (4): 265-272				2011
	+									ocs	XnAFP2				Agrobacterium-mediated Transformation of Duoxi 1 with XnAFP2 Gene								农杆菌介导拒食蛋白XnAFP2转化恢复系多系一号的研究	Biotechnology Bulletin, 2011, (11): 182-186				2011
	+			+		+				Cry1C*					Development of Transgenic Insect-resistant Japonica Rice with Cry1 C* Gene								转Cry1C*基因抗虫水稻的培育	Molecular Plant Breeding, 2011, 09 (6): 702-708				2011
	+	+	+	+			+			cry1Ac	sck				Breeding and Identification of Insect-Resistant Rice with Two Insecticidal Genes, sbk and sck								sbk和sck双价抗虫转基因水稻的育成和鉴定	Chinese Journal of Rice Science, 2011, 25 (6): 599-604				2011
	+	+								cry1A	cry2	cry1b			Rice Cryptochrome Gene Cry1a/Cry2/Cry1b RNAi Expression Vector Construction and Its Genetic Transformation Studies								水稻隐花色素基因Cry1a/Cry2/Cry1bRNAi表达载体构建及遗传转化研究	Chinese Journal of Tropical Crops, 2011, 32 (10): 1843-1848				2011
		+					+			cry1Ab/cry1Ac					Integrated Construction and Event-specific Real-time PCR of Transgenic Rice Bt Shanyou 63								转基因水稻Bt汕优63的整合结构和品系特异性定量PCR方法	Journal of Agricultural Biotechnology, 2011, 19 (3): 434~441				2011
	+		+				+			osc	OsPHDl				Overexpression of a Plant Homedomain (PHD)-finger Transcription Factor,OsPHD1,Can Enhance Stress Tolerance in Rice								植物同源结构域(PHD)-finger家族转录因子OsPHD1的过量表达可提高水稻的耐逆性能	Journal of Agricultural Biotechnology, 2011, 19 (3): 462~469				2011
	+			+						pRactl	PMI	pat	GFP		Development of Rice GeneticTransformation Using pmi Gene as A Selectable Maker								以pmi为筛选标记的水稻转基因研究	Journal of Anhui Agriculture Science.,2011, 39 (17): 10143-10146				2011
	+	+			+				+	OsTCTP					Resistance analysis of transgenic rice over-expressing OsTcTP under mercury stress								过表达OsTCTP转基因水稻汞抗性分析	Shandong Agricultural Sciences, 2011, 5 (1): 1-7				2011
	+			+			+			cry1Ab	cry2Ab				Transgenic insect-resistant rice expressing both cry1Ab and cry2Ab								含cry1Ab和cry2Ab双基因的抗虫转基因水稻的研究	Master Dissertation, Zhejiang University, 2011				2011
	+	+	+							OsSQS					Research of Genetic Transferring Plant Sterols Key Enzyme OsSQS Gene into Rice								植物甾醇合成关键酶基因OsSQS遗传转化水稻的研究	Master Dissertation, Fujian Agriculture and Frestry University, 2011				2011
	+	+	+							AmAl	PGluB	omhLF	pGt1		Transformation of rice with amaranth AmAl and hLF gene								籽粒苋AmAl基因和人乳铁蛋白基因转化水稻的研究	Doctoral Dissertation, Fujian Agriculture and Frestry University, 2011				2011
		+		+						OsmCSD2					Over-Expression of miR398-Resistant Version of OsCSD2 Gene in Rice Enhance Tolerance to Heavy Metal Stress								过表达抗miR398的OsmCSD2基因提高水稻的重金属抗性	Plant Physiology Journal 2011, 47 (11): 1064-1068				2011
	+		+							OsbZIP60					Research on Heat and Drought Tolerance in Rice(Oryza sativa L.)by Overexpressing Transcription Factor OsbZIP60								过量表达转录因子OsbZIP60对水稻抗热和抗旱能力的研究	Scientia Agricultura Sinica, 2011,44 (20): 4142-4149				2011
					+					pib4					Transgene of Rice Blast Resistance Gene Pib4								抗稻瘟病基因pib4的转基因研究	Journal of Anhui Agriculture Science, 2011，39 (22): 13303-13305				2011
				+		+				cry2A					Development of Japonica Rice with Insect － resistant Gene Cry2A* by Agrobacterium － mediated Transformation								利用农杆菌介导法获得转cry2A抗虫基因水稻的研究	Shandong Agricultural Sciences, 2011, 5 (1): 3-7				2011
	+	+					+			NAT	ipt				Breeding of high efficient nitrogen utilization transgenic rice through intragenesis technology								利用同源转基因技术培育氮高效利用转基因水稻	Acta Agriculturae Zhejiangensis, 2011, 23 (5): 862-869				2011
	+	+	+	+						CPR5					Transformation of Pleiotropic Gene CPR5 from Arabidopsis into Zhonghua 11 (Oryza sativa L.subsp.Japonica								拟南芥多效性基因CPR5转化水稻中花11的研究	Acta Scientiarum Naturalium Universitatis Sunyatseni, 2011, 50 (4): 84-90				2011
	+	+		+		+				PNRSC					Construction of Biosafe Vectors of Resveratrol Synthase Gene and Rice Genetic Transformation								生物安全性白藜芦醇合成酶表达载体的构建及水稻遗传转化	Acta Agriculturae Boreali-Sinica, 2011, 26 (2): 114-118				2011
	+									Xa31(t)					Cloning and Genetic Transformation of the Candidate Genes for the Bacterial Blight Resistance Gene Xa31(t)in Rice								水稻白叶枯病抗性基因Xa31(t)候选基因的克隆及遗传转化	Chinese Agricultural Science Bulletin, 2011, 27 (18): 223-227				2011
	+	+								nad1					Construction and Genetic Transformation of Over-Expression Vector of nad1 Gene in Rice								水稻线粒体nad1 基因超表达载体的构建和遗传转化	Agricultural Science ＆ Technology, 2011, 12 (7): 963－965				2011
	+	+							+	sm-Ngt1					Effects of sm-Ngt1 on the Plant Height in the Transgenic Rice								糖基转移酶基因sm-Ngt1 对水稻株高的影响	Journal of Anhui Agriculture Science, 2011, 39 (29): 17785－17787				2011
	+	+		+		+				BADH					Breeding and Traits Evaluation of BADH and Bar Gene Transgenic Rice								转BADH和Bar基因水稻培育及其相关特性评价	Life Science Research, 2011, 15 (3): 209-217				2011
		+		+						BcICE1					Integratting the Low Temperature Stress Transcription Factor BcICE1 Gene into Rice Improves Cold Tolerance								转低温胁迫转录因子BcICE1基因水稻提高抗寒性	Molecular Plant Breeding, 2011, 9 (6): 696-701				2011
	+	+			+					Osxoc1334					Transformation of a NBS-LRR Protein Gene and Its Overexpression in Rice								一个NBS-LRR蛋白质基因转化水稻及其超量表达	Journal of Xiamen University (Natural Science), 2010, 49 (4): 552-557				2010
	+	+	+							np3/np5					Resistance of Antimicrobial Peptide Genes Transgenic Rice to Bacterial Blight								转中国对虾抗菌肽基因水稻抗白叶枯病效应初析	Chinese Journal Rice Science, 2010, 24 (4): 335-340				2010
	+	+		+		+				GsHLP2	GsHLP8				Genetic transformation of high lysine protein gene into rice								高赖氨酸蛋白基因对水稻的遗传转化	Journal of Fujian Agriculture and Frestry Unive rsity (Natural Science Edition), 2010, 49 (4): 552-557.				2010
	+	+			+	+				p29A	OsMAPK4				Analysis of Tolerance and Screening of Rice with OsMAPK4 and OsCDPK7 Gene on Salt Stress and Alkali Stress								转OsMAPK4、OsCDPK7基因耐盐碱水稻的筛选与抗性分析	Master Dissertation, Northeast Agriculture University, 2010				2010
			+	+						crylCa					Synthesis of cry1Ca Pesticidal Gene,expression in E.coli and transgenic indica rice develoment								杀虫基因crylCa的人工合成、原核表达及其转基因水稻的培育	Master Dissertation, Fujian Agriculture and Frestry University, 2010				2010
			+												Genetic analysis of heat tolerance in the Transgenic TRI Rice and Progenies								转TR1基因水稻及后代的耐热性遗传分析	Master Dissertation, Sichuan Agricultural University, 2010				2010
	+	+								OsCOI					Cloning and Genetic Transformation of a Novel Rice Cold-inducible Gene OsCOI								水稻苗期低温诱导表达新基因OsCOI的克隆、过表达载体的构建与转化	Acta Agriculturae Boreali-Sinica, 2010, 25 (1): 18-22				2010
				+						T-PEPC	G170	cry1Ab-vip3DA			Transgrnetic insect-resistant rice expressing both cry1Ab and cry2Ab								转Bt融合基因cry1Ab-vip3DA抗虫转基因水稻的研究	Master Dissertation, Zhejiang University, 2010				2010
	+	+	+		+					atx					Expression of Exogenous Xylanase Gene atx in Rice and Study the Characteristics of transgenic Rice Plants								外源木聚糖酶基因atx在水稻中的表达及其转基因后代特性研究	Master Dissertation, Zhejiang University, 2010				2010
	+		+				+			OCS	OsPHDl				Overexpression of a kind of transcription factor,OSPHDI, can enhance stress tolerance in rice								转录因子OSPHD1的过表达提高水稻耐逆性的研究	Master Dissertation, Anhui Agriculture University, 2010				2010
		+								GluA3	Waxy/SBE3				Improving the Amylose Content by Overexpression of Wx Gene and RNA Interference of SBE3 Gene in Rice								复合调控Waxy与SBE3基因提高水稻直链淀粉含量的研究	Master Dissertation, Anhui Agriculture University, 2011				2010
	+	+		+		+				RSVSP					Production of RVS-resistant Transgenic Rice by Twin T-DNA System and RNAi								利用双T-DNA载体系统和RNAi培育抗水稻条纹病毒转基因水稻	Master Dissertation, Shandong Agriculture University, 2011				2010
	+	+		+		+				EGV					Study on Cloning of Cellulase from Trichoderma reeseri and Overexpression in Rice (Oryza sativa L.)								里氏木霉纤维素酶基因的克隆及在水稻中的过表达研究	Master Dissertation, Anhui Agriculture University, 2010				2010
	+	+			+					OsPSK 3					Over-expression of OsPSK3 increases chlorophyll content of leaves in rice								过表达OsPSK 3 基因增加水稻叶片叶绿素含量	Hereditas (Beijing), 2010 , 32 (12): 1281―1289				2010
	+	+		+		+				_AhCMO_					The Development of Transgenic Rice with AhCMO Gene and Analysis of its Salinity Tolerance								转山菠菜胆碱单加氧酶基因_AhCMO_水稻创制及其耐盐性研究	Life Science Research, 2010, 14 (3): 219-225.				2010
	+		+	+	+				+	cry1Ab					Development of TransgenicBacillus thuriengiens is Rice Resistant to Rice Stem Borers and Leaf Folders								转基因水稻“克螟稻”选育	Journal of Zhejiang Agricultural University, 1998, 24 (6): 579-580				2010
		+		+						DREB1A					Construction of Plant Expression Vector of CbDREB1A Gene and Its Transformation into Photoperiod- and Thermo-sensitive Genic Male Sterile Line in Rice								CbDREB1A基因表达载体构建及转化水稻光温敏核不育系的研究	Hybrid Rice, 2009, 24 (6): 49-53				2009
			+							Hd3a					Studies on Transgenic Rice with Heat-shock Inducible Expression of Hd3a Gene								热激诱导表达Hd3a的水稻转基因研究	Journal of Xiamen University (Natural Science), 2009, 48 (5): 733-737				2009
			+							pHSP	pepc				Genetic Analysis of Restorer Line N 175 with pepc from Sugarcane								转甘蔗pepc基因籼稻恢复系N175的遗传学分析	Molecular Plant Breeding, 2009, 7 (4): 666-670				2009
	+	+	+							DsRed2	AmA1	pGt1			Cloning, Prokaryotic Expression and Plant Expression Vector Construction of AmA1 Gene from A maranthus hypochondriacus								籽粒苋AmA1基因的克隆、原核表达及植物表达载体构建	Molecular Plant Breeding, 2009, 7 (4): 793-800				2009
	+	+	+					+		UTR	antisense Wx				Breeding and Field Performance of Novel Soft and Waxy Transgenic Rice Lines without Selectable Markers								无抗性选择标记转基因软米和糯稻新品系的选育及中间试验	Acta Agronomica Sinica, 2009, 35 (6): 967−973				2009
	+	+	+	+						OsSUT5Z	OsMST4	OsCIN3	OAAT		Construction of Large DNA Fragment Cloning Vectors and Rice Transformation Based on Transformation-competent Artificial Chromosome (TAC) Vector								基于TAC多基因转化载体的构建及其转化水稻的研究	Master Dissertation, Fujian Agriculture and Frestry University, 2009				2009
	+		+							Hvppc2					Expression profile analysis of OsCPKs and research of Hvppc2 transgenic rice								水稻CDPKs基因的表达谱分析和黑藻Hvppc2转基因水稻的培育和功能分析	Doctoral Dissertation, Huazhong Agricultural University, 2009				2009
	+									EPSPs					Development of Glyphosate-resistant transgenic rice with synthetic EPSPS gene and analysis of rice promoter								抗除草剂草甘膦转基因水稻的鉴定和水稻启动子的分析	Master Dissertation, Huazhong Agricultural University, 2009				2009
	+	+	+		+					crtB	crtL	crtY	Cab		Analysis of related genes of carotenoids synthesis of Er-winia uredovora in transgenic rice								欧文氏菌类胡萝卜素合成相关基因遗传转化水稻的初步研究	Master Dissertation, Hebei Normal University, 2009				2009
	+	+	+		+					Gt1	Waxy				Using expression vector with Gtl gene under the rice Waxy promoter changed the quantity and distribution of the rice								利用蜡质基因启动子引导谷蛋白Gt1基因表达载体改变稻米蛋白含量及分布	Master Dissertation, Shanghai Normal University, 2009				2009
	+	+	+	+	+					Cjhppd					The construction of monocotyledon expression vector with Coptis japonica 4-hydroxyphenylpyruvate dioxygenase gene and the genetic transformation of rice								Cjhppd基因单子叶植物表达载体构建及水稻的遗传转化	Master Dissertation, Hebei University, 2009				2009
	+									Bcl-2					Mechanism Analysis of Resistance to Oxidative Stress in Bcl-2 Transgenic Rice and Development of Root Border Cells								转Bcl-2水稻抗氧化胁迫及水稻边缘细胞发育调控的研究	Doctoral Dissertation, Zhejiang University, 2009				2009
	+	+	+							Sbe	Gt1				Studies on Starch Structure and Functional Properties of High-Amylose Transgenic Rice and Different Waxy Rice Varieties Studies on Starch Structure and Functional Properties of High-Amylose Transgenic Rice and Different Waxy Rice Varieties Studies on Starch Structure and Functional Properties of High-Amylose Transgenic Rice and Different Waxy Rice Varieties Studies on Starch Structure and Functio…								高直链淀粉转基因水稻和不同糯稻品种稻米的淀粉结构及其功能特性研究	Doctoral Dissertation, Yangzhou University, 2009				2009
	+	+	+		+					DDSA	Gt1				Cloning DDSA gene ,the key gene of CoQ1o biosyhthesis pathway and transformating into rice								辅酶Q<,10>生物合成关键酶基因DDSA的克隆及转化水稻研究	Master Dissertation, Fujian Agriculture and Frestry University, 2009				2009
									+						Obtainment of Rice Seedling Transformed by Chloroplast Superoxide Dismutase Gene								转叶绿体超氧化物歧化酶基因水稻的获得	Journal of An hu iAgri. Sci , 2009, 37 ( 27): 12942-12944				2009
	+	+		+		+				OsbHLH1					Construction of Over-expression Vector of OsbHLH1 Gene and Transformation of Rice								OsbHLH1基因过表达载体构建及转化水稻研究	Biotechnology Bulletin, 2009 (7): 76-81				2009
			+												A Study on pta and sb401 Genes Co-transformation of Rice via Agrobacterium tumefaciens								农杆菌介导pta和sb401基因共转化水稻的研究	Acta Agriculturae Boreali-Occidentalis Sinica, 2009, 18 (2); 79-82				2009
	+	+	+		+										A preliminary study on agrobacterium tumefaciens-mediated co-transformation of double genes in rice								农杆菌介导的水稻双基因共转化初步研究	Journal of Nuclear Agricultural Sciences, 2009, 28 (1): 28-32				2009
	+	+	+	+	+					Antisense RACK1					Down-regulation of OsRACK1 by Anti-sense Approach Results in Drought Tolerance Enhancement in Rice (Oryza sativa)								转反义OsRACK1基因增强水稻抗旱能力	Chinese Bulletin of Botany, 2008, 25 (6): 648-655				2008
	+		+							ICEI					A Further Study on ICE1 Gene Transfer from Arabidopsis into Rice								拟南芥ICEl基因转化水稻的进一步研究	Biotechnology Bulletin, 2008 (6): 87-90, 96				2008
	+									ICEI	Xa23				Genetic Analysis on Bacterial Blight Resistance of Xa23-Transgenic Rice								转Xa23基因水稻的白叶枯病抗性及其遗传分析	Acta Agronomica Sinica, 2008, 34 (10): 1679-1687				2008
	+	+	+	+						epsp102epsp					A Gene Encodes 5-enol-pyruvylshikimate-3-phosphate Mutagenized by Error-prone PCR Conferred Rice with High Glyphosate-tolerance								Error-prone PCR获得EPSP酶突变基因提高水稻的草甘膦抗性	Molecular Plant Breeding , 2008, 6 (5)): 830-836				2008
	+	+			+	+				E12	OsCDPK7				Cultivation of transgenic rice plants with OsCDPK7 gene and its salt tolerance								转OsCDPK7基因水稻的培育与耐盐性分析	Hereditas(Beijing), 2008, 30(8): 1051-1055				2008
	+	+	+	+						WBLRP					Studies on harvest index and culm lysine content in the transgenic brittle culm rice inserted lysine-rich protein gene								转高赖氨酸蛋白基因脆茎水稻的收获指数及秸秆赖氨酸含量的研究	Acta Agriculturae Zhejiangensis, 2008, 20( 4): 225- 230				2008
	+		+							NCED3					Overexpression of AtNCED3 Gene in Rice Exhibits Improved Drought Tolerance in Transgenic Plants								拟南芥NCED3基因在水稻中的过量表达可以提高水稻的干旱胁迫耐受性	Journal of Fudan University (Natural Science), 2008, 17 (3): 288-294.				2008
				+						G6					Identification of a gene Encoding EPSPS with Resistance of Glyphosate of Transgenic Glyphosate-resistance Rice Plants								一种抗草甘膦基因的发现和抗草甘膦转基因水稻的培育	Doctoral Dissertation, Zhejiang University, 2008				2008
										Gy7	Gtl				Construction of expression vector with Gy7 gene under the Gtl promoter and transformation of rice								水稻Gt1启动子引导大豆Gy7基因表达载体构建及转化水稻研究	Master Dissertation, Shanghai Normal University, 2008				2008
	+	+	+		+					Pi-d2					A Study on Introducing the Blast Resistance Gene Pi-d2 into the Main Parents of Hybrid Rice Shuhui527 Mediated by Agrobacterium Tumefaciens								利用农杆菌介导法将抗稻瘟病基因Pi-d2导入杂交稻骨干亲本蜀恢527的研究	Master Dissertation, Sichuan Agricultural University, 2008				2008
	+	+	+							Em					Establishment of Efficient Rice Regeneration System and Transformation of Soybean Em Gene								水稻高效再生体系的建立及其对大豆Em基因的转化	Acta Botanica Boreali-Occidentalia Sinica, 2008, 28 (4): 0686-0691				2008
	+	+								cry2	cry1b	cry1A			Rice Cryptchrome Gene RNAi Expression Vector Construction and Studies on the Transformation of Rice								水稻隐花色素基因（Cryptochrome）RNAi表达载体构建与转化水稻的研究	Doctoral Dissertation, Fujian Agriculture and Frestry University, 2008				2008
	+					+				rd29A	DREB1A				Studies on Transformation of Photo-sensitive and Thermo-sensitive Genie Male Sterile Rice with Dehydration Responsive Transcription Factor Gene DREB1A								干旱响应转录因子DREB1A基因导入水稻光温敏核不育系的研究	Life Science Research, 2008, 12 (1): 24-28				2008
	+	+	+	+						PGlu	pta	sb401			Analysis on T4 Progeny of Transgenic Rice with Lysine-Rich Protein Gene (sb401) Mediated by Agrobacterium tumefaciens Transformation								农杆菌介导的转高赖氨酸蛋白基因(sb401)水稻T4代分析	Chinese Journal of Rice Science, 2008, 22 (2): 131-136				2008
	+	+				+				Psec/appA2					Transformation of Phytase Gene into Rice by Particle Bombardment								基因枪介导获得转植酸酶基因水稻研究	Chinese Journal of Applied and Environmental Biology, 2008, 14 (1): 006-010				2008
	+									OCS	ppt	CBF1			Transformation of Rice with CBF1 Gene Maybe Confer Resistance to Cold								转CBF1基因提高水稻抗寒能力的初步研究	Journal of Jilin Agricultural Sciences, 2008, 33 (5): 6-8				2008
		+	+							Antisense wx					Transgenic Plants of Markerless Antisense Waxy Indica Rice Obtained by Agrobacterium-Mediated Co-transformation								共转化获得无抗性标记的转反义蜡质基因籼稻	Scientia Agricultura Sinica, 2008, 41 (10): 2909-2915				2008
		+	+	+						OsNPR1					Over-expression of OsNPR1 in rice stably enhances the rice resistance								过量表达OsNPRl基因稳定提高水稻对白叶枯病的抗性	Journal of Guangxi Agriculture and Biology Science, 2008, 27 (4): 335-342				2008
	+	+						+	+	GO					Acquirement of GO Transgenic Plants by Agrobacterium tumefaciens in Creeping Bentgrass (Agrostis stolonifera L.)								农杆菌介导法获得匍匐翦股颖转GO基因植株	Jiangsu Journal of Agricultural Sciences, 2008, 27 (3): 251-256				2008
	+			+					+	OCS	pemGl				Medium Selection for Tissue Culture of japonica Rice Cultivar Nipponbare and Obtainment of Transgenic Plants with an Elicitor-coding Gene from Magnaporthe grisea								水稻品种日本晴粳稻组培培养基的筛选及转稻瘟菌蛋白激发子基因植株的获得	Journal of Agricultural Biotechnology, 2008, 16 (5): 824-830				2008
	+									Fer					Preliminary Study on the Soybean Ferritin Transgenic Rice								转大豆铁结合蛋白基因水稻的初步研究	Acta Agriculturae Boreali-Occidentalis Sinica, 2008, 17 (6): 84-87				2008
	+	+	+		+					wx	232wx				Reducing Amylose Content of ‘Xiang Qing' and Hybrid Rice Seeds by Introducing Anti-Waxy Gene								转反义蜡质基因_湘晴_及其杂交稻米的直链淀粉含量研究	Acta Botanica Boreali-Occidentalia Sinica, 2008, 28 (6): 1082-1087				2008
	+	+		+		+				Cry1A(a/c					Genetic transformation of Bar- Bt- 1Ab gene in Japonica rice with pollen- tube pathway								花粉管通道法转Bar-Bt-1Ab基因到北方优质粳稻的研究	Journal of Northeast Agricultural University, 2008, 39 (7): 5-8				2008
	+			+					+	OCS	polyA	NASHOR1			Study on improving stress tolerances of rice by transformation of barley nicotianamine synthase gene								转大麦烟酰胺合成酶基因提高水稻逆境胁迫耐受性的研究	Journal o f Guangxi Agriculutre and Biology Science, 2008, 27 (1): 25-30				2008
	+		+							ICEl					Transformation of ICE1 Gene Mediated by Agrobacterium Improves Cold Tolerance in Transgenic Rice								农杆菌介导的转ICEl基因提高水稻的耐寒性	Chinese Journal of Rice Science, 2007, 21 (5): 482- 486.				2007
		+		+						ABP2					The Function Analysis of Maize Transcription Factor ABP2 in Transgenic Rice under Stress								玉米转录因子ABP2在转基因水稻中的抗逆功能分析	Master Dissertation, Guizhou University, 2008				2007
	+	+	+	+						aatp/AATP					Preliminary studies on transgenic indica rice with four ATP/ADP transporter constructs								转ATP/ADP转运蛋白基因籼稻的初步研究	Journal of Fujian Agriculture and Forestry University( Natural Science Edition), 2007, 36 (5): 491-495				2007
		+		+					+	OsTOM1					Construction of rice OsTOM1-RNAi expression constructs and Trangenic rice Plants expressing OsTOM1-RNAi								水稻OsTOM1-RNAi载体与表达OsTOM1-RNAi转基因水稻的构建	Master Dissertation, Guangxi University, 2007				2007
	+	+	+		+					desD					Expression of Fatty Acid Desaturase Gene desD from Cyanobacterium Strain PCC6803 in Transgenic Rice (Oryza sativa)								集胞藻PCC6803脂肪酸脱饱和酶基因desD在转基因水稻中的表达	Journal of Wuhan University (Nature Science Edition), 2007, 53 (4): 442-448				2007
		+		+						bt					Breeding of Elite Transgenic Rice Lines Pyramided with Multigenes Conferring Resistance to Disease, Insect and Herbicide								多价抗病虫抗除草剂转基因水稻选育的研究	Master Dissertation, Yangzhou University, 2007				2007
	+	+	+	+	+					SUSIBA2					Construction of Susiba2 Sense and Antisense Expression Vectors and Genetics Transformation to Rice								SUSIBA2正反义表达载体的构建及其对水稻的遗传转化	Master Dissertation, Fujian Agriculture and Frestry University, 2007				2007
		+				+	+	+	+	ipt					Effect of ipt-bar binary genes on growth and development in rice (Oryza sativa)								转ipt-bar双价基因对水稻生长发育影响的研究	Master Dissertation, Guizhou University, 2007				2007
	+	+	+		+					RSV	ocs3'				Studies on transgenic rice resistent to RSV mediated by RNA-Interference								RNAi介导的抗RSV转基因水稻研究	Doctoral Dissertation, Chinese Academy of Agricultural Sciences, 2007				2007
	+	+	+		+					ppc					Effect of Overexpression of MaizeppcGene on Photosynthesis in Transgenic Rice Plants								玉米ppc基因过表达对转基因水稻光合速率的影响	Acta Agronomica Sinica, 2007, 33 (5): 717-722				2007
	+	+		+						cry1Ac					Improvement of rice resistance and grain quality via transgenic approach								利用转基因技术改良水稻抗性和品质的研究	Doctoral Dissertation, Yangzhou University, 2007				2007
	+	+		+						AP1					Improvement of rice resistance and grain quality via transgenic approach									Doctoral Dissertation, Yangzhou University, 2007
	+	+		+		+				GNA					Improvement of rice resistance and grain quality via transgenic approach									Doctoral Dissertation, Yangzhou University, 2007
	+	+		+		+				cry1Ac	GNA	AP1			Improvement of rice resistance and grain quality via transgenic approach									Doctoral Dissertation, Yangzhou University, 2007
								+		Wx 5'UTR		Antisense Wx			Improvement of rice resistance and grain quality via transgenic approach									Doctoral Dissertation, Yangzhou University, 2007
	+		+							full Wx					Improvement of rice resistance and grain quality via transgenic approach									Doctoral Dissertation, Yangzhou University, 2007
	+	+	+							WxcDNA	Gt1				Improvement of rice resistance and grain quality via transgenic approach									Doctoral Dissertation, Yangzhou University, 2007
		+								pGlu	RZ10	hLF	SB401	p19Z	Rapidly Obtaining the Marker-Free Transgenic Rice with Three Target Genes by Co-Transformation and Anther Culture								利用共转化和花药培养技术快速获得无选择标记的三价转基因水稻	Chinese Journal of Rice Science, 2007, 21 (5): 475-481				2007
	+									PyTPS					Genetic Diversity Analysis and the Rice Genetic Transformation of Trehalose-6-phosphate Synthase Gene of Porphyra								紫菜遗传多样性分析及其6-磷酸海藻糖合成酶基因转化水稻的	Doctoral Dissertation, Ocean University of China, 2007				2007
	+	+	+							PPa	rbcS				Cloning of inorganic pyrophosphatase (PPA) gene and construction of its plant expression vetor								无机焦磷酸化酶融合基因克隆分析及表达载体的构建	Southwest China Journal of Agricultural Sciences, 2007, 20 (6): 1267-1271				2007
	+					+									Development of Herbicide-resistant Transgenic Indica Rice								转Ba r 基因抗除草剂水稻的培育	Hubei Agricultural Sciences, 2007, 46 (4): 488-490				2007
			+							Rubisco	Cry1A(b				Development and identification of insect resistant transgenic rice with Cry1A(b) gene								转Cry1A(b) 基因抗虫水稻的获得及鉴定	Acta Agriculturae Zhejiangensis, 2007, 9 (4): 264-267				2007
	+			+		+				cry1Ab					Development of Transgenic Insect-resistant Indica Rice with a cry1Ab Gene								转cry1Ab基因抗虫水稻的培育	Journal of Huazhong Agricultural University, 2007, 26 (2): 157-160				2007
	+									Rxo1	Kan				Introduction of a Non-host Gene Rxo1 Cloned from Maize Resistant to Rice Bacterial Leaf Streak into Rice Varieties								玉米细菌性条斑病非寄主抗性基因Rxo1转化水稻的研究	Chinese Journal of Biotechnology, 2007, 23 (4)				2007
	+	+	+	+	+					PhyI					Expression of Recombinant Phytase in Transgenic Rice								转基因水稻中重组植酸酶的表达	Chinese J Rice Sci, 2006, 20 (3): 243-247				2006
				+						HvAPXl					Overexpressing peroxisomal ascorbate peroxidase gene in rice enhanced tolerance to cadmium stress								过量表达pAPX基因提高水稻对镉胁迫的耐性	Acta Pedologica Sinica, 2006, 43 (1): 111-116				2006
										Xa21					Generation of Selectable Marker-free and Vector Backbone Sequence-free Xa21 Transgenic Rice								无选择标记和载体骨干序列的Xa21转基因水稻的获得	Chinese Journal of Biotechnology, 2006, 22 (2): 204-210				2006
		+								Gt1	LRP				LRP Transgenic Indica Rice Restorer Line without Resistance Selection Marker								无抗性选择标记的转高赖氨酸蛋白（LRP ）基因籼稻恢复系的获得	Acta Agronomica Sinica, 2006, 32 (8): 1248-1251				2006
	+	+	+		+					CycD2					Primary Analysis of Ectopic Expression of Arabidopsis CycD2 in Rice								拟南芥CycD2基因在水稻中的表达及初步分析	Journal of Agricultural Biotechnology, 2006, 14 (4): 533-536				2006
	+	+	+							OsCH2	OsHSP82				OsCH2 and OsHSP82 overexpression vectors Construction and gene transformation into rice								OsCH2和OsHSP82基因过表达载体构建和水稻遗传转化	Master Dissertation, Hunan Agicultural University, 2006				2006
	+		+	+	+				+	OCS	OsiWRKY	OPBP1	Rbcs		Overexpression of Two Different Transcription Factors, OPBP1 and OsiWRKY, Enhances Resistance Against Pathogen Attack and Salt Stress in Rice								转录因子OPBP1 和OsiWRKY基因的超表达提高水稻的耐盐及抗病能力	Chinese Journal Rice Science, 2006, 20 (1): 13-18				2006
	+	+	+		+		+			PSAG12	ipt				Introduction of PSAG12-ipt gene into rice and preliminary study on antisenescence of transgenic rices								转PSAG12-ipt 基因水稻植株的获得及其延衰性的初步研究	Journal of Fujian Agriculture and Forestry University( NaturalScienceEdition), 2010, 39(1)				2006
		+								Xa21					Breeding and Food Safety Evaluation of Transgenic Hybrid Rice Harboring Xa21 Gene								转xa21基因杂交水稻选育与评价	Molecular Plant Breeding, 2006, 4 (2), 174-180				2006
	+	+	+		+			+	+	PEP					Raising Fat Content in Transgenic Rice by Anti-PEP Gene Transformation								应用反义PEP 基因表达技术提高稻米脂肪含量	Journal of Plant Physiology and Molecular Biology 2006, 32 (3): 339 -344				2006
		+	+		+					Antisencse Wx					Transforming parent lines of hybrid rice with anti一sense Waxy gene								反义蜡质基因转化杂交稻亲本的研究	Master Dissertation, Hunan Agicultural University, 2006				2006
										Xa21					Co-expression of CecropinB and Xa21 Genes Increased Resistance to Bacterial Blight in Transgenic Rice								CecropinB与Xa21基因共表达提高转基因水稻白叶枯病抗性	Chinese Journal Rice Science, 2006, 20 (1): 105-108				2006
			+	+						NHX1					Expression and functional characterization of Na+/H+ antiporter genes ThNAX1and AtNHX2 in transgenic rice								Na+/H+逆向转运蛋白基因ThNHXl和AtNHX2在转基因水稻中的表达与功能分析	Acta Agronomica Sinica, 2008, 34 (4): 557−564				2006
			+	+						NHX2					Expression and functional characterization of Na+/H+ antiporter genes ThNAX1and AtNHX2 in transgenic rice									Acta Agronomica Sinica, 2008, 34 (4): 557−564
	+					+				NHX2					Expression and functional characterization of Na+/H+ antiporter genes ThNAX1and AtNHX2 in transgenic rice									Acta Agronomica Sinica, 2008, 34 (4): 557−564
		+	+	+	+					lys					Research of transforming Lysine-rich protein gene to rice								高赖氨酸蛋白基因遗传转化水稻的研究	Journal of Fujian Agriculture and Forestry University (Natural Science Edition), 2006, 35 (6): 615-618				2006
	+	+	+							PPF1					Delaying Leaf-senescence Via PPF1 Gene Transformation and Characterization of Several Mutants Related to Reproduce in Rice								利用PPF1基因延缓叶片衰老和几个水稻生殖相关突变体的研究	Doctoral Dissertation, Sichuan Agricultural University, 2006				2006
	+									GST	CAT1				Transferring the Suaeda salsa Glutathione S-Transferase and Catalase Genes Enhances Low Temperature Stress Resistance in Transgenic Rice Seedlings								转入盐地碱蓬谷胱甘肽转移酶和过氧化氢酶基因增强水稻幼苗对低温胁迫的抗性	Journal of Plant Physiology and Molecular Biology, 2006, 32 (2): 231-238				2006
	+	+	+		+					osSBE1	OsACT1	cyclAt			Introduction of cyclAt and GUS into Rice to Obtain Transgenic Plants by Particle Bombardment								基因枪法导入cyclAt和GUS基因获得转基因水稻	Journal of Natural Science of Hunan Normal University, 2006, 29 (3): 80-85				2006
	+	+	+		+					mangrin					Transformed Rice with Salt Tolerance-related Genes of Bruguiera sexangula by Agrobacterium Meditation								红树林耐盐相关基因转化水稻的研究	Acta Botanica Boreali-Occidentalia Sinica, 2006, 26 (6): 1105-1109				2006
	+	+			+					T35s	PMI		GNA		Agrobacterium tumefaciens-mediated Transformation of Rice for gna Gene								根癌农杆菌介导gna基因对水稻的转化	Chinese Agricultural Science Bulletin, 2006, 22 (6): 40-44				2006
	+									EPSP	CS				Introduction of Citrate Synthase Gene (CS) into an Elite Indica Rice Restorer Line Minghui 86 by A grobacterium -mediated Method								利用农杆菌介导法将柠檬酸合成酶基因（CS)导入籼稻品种明恢86	Molecular Plant Breeding, 2006, 4 (2): 160-166				2006
	+	+	+							BADH2			rbcS		Transgenic Rice with a Gene Encoding for the Betaine Aldehyde Dehyrogenase 2（BADH2）of Tomato								番茄BADH2基因转化水稻	Journal of Anhui Agricultural Science, 2006, 34 (23): 6138-6139, 6184				2006
	+	+	+					+	+	PPDK					Integration of C4-specific PPDK Gene of Maize to C3 Rice IR64 and its Photosynthesis Characteristics Analysis								玉米高光效基因PPDK在籼稻IR64中的整合及其与光合作用相关的特性分析	Molecular Plant Breeding, 2006, 4 (6): 797-804				2006
	+	+	+		+					CB F1					Enhancement of stress tolerance of transgenic rice with cbf1 gene transformation								转CB F1基因增强水稻的耐逆性	Journal of Nuclear Agricultural Sciences, 2006, 20 (3): 169-173				2006
				+						HvAPX1					Overexpressing peroxisomal ascorbate peroxidase gene in rice enhanced tolerance to cadmium stress								过量表达pAPX基因提高水稻对镉胁迫的耐性	Acta Pedologica Sinica, 2006, 43 (1): 111-116				2006
	+	+								O21- O14-A21-HBcAg					Study on Introducing FMDV Antigenic Determinant Fused								口蹄疫抗原决定簇融合基因转化水稻的研究	Doctoral Dissertation, Xiamen University, 2006				2005
	+		+		+					Xa21					Transfer of the Rice bacterial leaf blight resistance gene Xa21 into three Japonica cultivars and preliminary characterization of a partial resistance line								水稻抗病基因Xa21转入3个粳稻品种的抗性初步分析	Acta Phytopathologica Sinica, 2005, 35 (3): 242-248				2005
				+						pepc					Procuction of marker-free transgenic rice with pepc gene by two agrobacterium-mediated co-transformation								双农杆菌共转化获得无标记转pepc基因的水稻植株	Chinese Journal of Applied and Environmental Biology, 2005, 11 (4): 393-398				2005
	+	+	+		+					rbcs	PEPC				Cloning key enzyme(PEPC、PPDK) genes of C4 photosynthesis from Barnyardgrass (Echinochloa) and PEPC gene transformation in Rice(Oryza Sativa) and Tobacco (Nicotiana tabacmn)								稗草C4关键酶(PEPC、PPDK)基因的克隆及PEPC基因对水稻和烟草的遗传转化	Doctoral Dissertation, Xiamen University, 2006				2005
	+	+				+				Metr					Agrobacterium-mediated Transformation of Rice Mature Embryos and Regeneration of Transgenic Plants with Metr Gene								根癌农杆菌介导转化水稻成熟胚及转Metr基因植株的获得	Hereditas (Beijing ), 2005, 27 (5): 772-778				2005
	+	+	+	+						PTA	Antisense Wx	PWX			A Study on Transformation of the Pinell is Tenata Agglutinin (pta) Gene and Waxy Antisense Gene into Rice Mediated by Agrobacterium								利用农杆菌介导法将pta和反义Wx双基因导入水稻的研究	Master Dissertation, Sichuan Agricultural University, 2005				2005
	+	+	+	+		+				cry1Ac	cry2A<'*>	cry9C<'*>			Production and evaluation of three kinds of insect-resistant Bt (crylAc, cry2A* and cry9C*) rice								三种Bt基因（cry1Ac、cry2A<'*>和cry9C<'*>）抗虫水稻的培育及评价	Journal of Huazhong Agricultural University, 2007, 26 (2): 157-160				2005
	+				+					OsNHXl					Overexpressing OsNHXI Enhanced Salt Tolerance in Upland Rice and The Combination of rd29A Promoter and the AtNCED3 Gene Improved Abiotic Stress Tolerance in Rice (Oryza sativa) by Gene Transfer								转基因耐盐旱稻的获得及转AtNCED3水稻的抗逆性研究	Doctoral Dissertation, China Agricultural University, 2005				2005
	+	+	+		+					AtNCED	rd29A				Overexpressing OsNHXI Enhanced Salt Tolerance in Upland Rice and The Combination of rd29A Promoter and the AtNCED3 Gene Improved Abiotic Stress Tolerance in Rice (Oryza sativa) by Gene Transfer									Doctoral Dissertation, China Agricultural University, 2005
		+		+			+			pin2	GS1	GS2			Highly Effective Expression of Glutamine Synthetase Genes GS1 andGS2 in Transgenic Rice Plants Increases Nitrogen-deficiency Tolerance								Highly Effective Expression of Glutamine Synthetase Genes GS1 andGS2 in Transgenic Rice Plants Increases Nitrogen-deficiency Tolerance	Acta Photophysiologica Sinica, 2005, 31 (5): 492-498				2005
				+						lys					Transfer of lysine-rich protein gene into grain-straw-dual-use rice via agrobacterium tumefaciens								农杆菌介导将高赖氨酸蛋白基因导入谷秆两用水稻	Chinese Journal of Applied and Environmental Biology, 2005, 11(3): 276-278				2005
	+	+	+	+	+					NDV					Expression and Immunization Testing of Fusion Protein of Newcastle Disease Virus in Leaf Tissue of Transgenic Rice								新城疫病毒融合蛋白在转基因水稻叶片中的表达及其免疫原性	Acta Genetica Sinica, 2005, 32 (12): 1305-1311				2005
	+	+							+	P-19Z	sb401				Transfer of High Lysine Gene sb401 into Rice and Analysis for Protein and Amino Acid Content in Transgenic Rice Seeds								水稻转高赖氨酸蛋白质sb401基因植株的获得及种子中蛋白质和氨基酸的含量分析	Acta Agronomica Sinica, 2005, 31 (5): 603-607				2005
	+	+							+	BADH					Production and Salt-tolerant Research of Transgenic Ricewith Betaine Aldehyde Dehydrogenase Gene								转甜菜碱醛脱氢酶基因水稻的获得及其耐盐性研究	Bulletin of Science and Technology, 2003, 19 (3)				2005
	+	+	+							Gt1	rbe1				Obtaining transgenic plants of elite indica rice containing rice starch branching enzyme gene rbe1 via Agrobacterium-mediated transformation								农杆菌介导获得转淀粉分枝酶基因rbe1籼稻	Journal of Fujian Agriculture and Forestry University (Natural Science Edition), 2004, 33 (1): 64-67				2004
	+	+	+		+			+		CBF1					Comparative investigation of transferring AtCBFl into rice(oryza sativa) and Arabidopsis								AtCBF1基因转化水稻和拟南芥的比较研究	Master Dissertation, Zhejiang University, 2004				2004
	+	+				+				prolamin	lys				Transfer of High Lysine-rich gene and bar gene into rice by microprojectile bombardment and detection of their transgenic plants								高赖氨酸蛋白基因和bar基因导入水稻及转基因植株的检测	Journal of Agricultural Biotechnology, 2004, 12 (4): 363-368				2004
	+	+	+		+					GluB-1	Ferritin				Endosperm-specific Expression of the Ferritin Gene in Transgenic Rice (Oryza sativa L.) Results in Increased Iron Content of Milling Rice								转基因水稻胚乳中表达铁结合蛋白提高稻米铁含量	Acta Genetica Sinica , 2004, 31 (5): 518-524				2004
	+	+	+		+					rca					Construction of Expression Vector with Antisense Rubisco Activase Gene and Its Genetic Transformation in Rice								Rubisco活化酶基因反义表达载体的构建与水稻的遗传转化	Hereditas (Beijing), 2004, 26 (6): 881-886				2004
	+	+	+		+					232wx	Antisense Wx				Antisense waxy Gene Introduced into the Calli in Parents of Hybrid Rice by Agrobacterium tumefaciens								利用农杆菌介导法将反义waxy基因转入籼型杂交稻保持系	Master Dissertation, Sichuan Agicultural University, 2004				2004
	+	+	+		+					Rbcs-3A	atzA				Agrobacterium-mediated Transformation of Rice (Oryza sativa L.) with atzA Gene								农杆菌介导的细菌阿特拉津氯水解酶基因对水稻的遗传转化	Scientia Agricultura Sinica, 2004, 37 (8): 1093-1098				2004
	+	+	+		+					PCAB	ME				Photosynthetic Features of Transgenic Rice Expressing Sorghum C4 Type NADP-ME								转高粱C4型NADP-ME基因水稻植株的光合生理特征	Chinese Science Bulletin, 2003, 48 (14): 873-882				2004
			+							waxy					Rapidly Obtaining the Markerless Transgenic Rice with Reduced Amylose Content by Co-transformation and Anther Culture								通过共转化和花药培养快速获得直链淀粉含量降低且无抗性标记的转基因水稻	Heilong Jiang Agricultural Sciences, 2008 (3): 5-7				2004
	+	+	+		+					pwx	Wx				A Study on Transformation of the Antisense Waxy Gene into Rice Mediated by A grobacterium								利用农杆菌介导法将反义Wx基因导入水稻的研究	Molecular Plant Breeding, 2004, 2 (6): 765-770				2004
			+							SUd1	Xa21				Construction of a brassinosteroids supersensitive chimeric receptor and rice transformation								油菜素内酯（BR)超敏感嵌合受体的构建和水稻转基因表达	Master Dissertation, Zhejiang University, 2003				2004
	+		+							OCS	PAL				Rice Blast Resistance and Peroxidase Activity of Rice Transformed with PAL Gene								转PAL基因水稻抗稻瘟病性和过氧化物酶活性的研究	Chinese Journal of Rice Science, 2004, 18 (4): 303-308				2004
	+	+	+		+					RSP1/RSP2		cry1Ac			Construction of Tissue-specific Expression Vectors of Cry1Ac and Rice Genetic Transformation								Cry1Ac基因组织特异表达载体构建及水稻遗传转化	Journal of Shanxi Agricultural University (Nature Science Edition), 2004, 24 (3): 213-215				2004
	+	+								GluB-1	PTA	Sb401			Introduction of insect resistance gene lystine-rich gene into super hybrid rice parental line 1826 through agrobacterium tumefaciens-mediated transformation									Molecular Plant Breeding, 2 (4), 495-500.				2004
	+	+	+							pta					A Primary Study of Transferring the Pinellia Tenata Agglutinin (pta) Gene into Rice and Expression								半夏凝集素基因 (pta) 导入水稻及其表达的初步研究	Acta Genetica Sinica, 2003, 30 (11): 1013-1019				2003
	+	+	+							SchiA					Construction of a New Plant Transformation Vector pBG1112 with a Chitinase Gene SchiA from Serratia marcescens and Its Genetic Transformation in Rice								含粘质沙雷氏菌几丁质酶SchiA基因的植物转化质粒pBG1112构建和水稻遗传转化	Journal of Agricultural Biotechnology, 2003, 11 (2): 121-126				2003
	+	+	+		+					ocs	ferritin				Introduction of ferritin gene into rice and the functional analysis of transgenic plants								铁蛋白基因的水稻转化及其功能初步分析	Journal of Zhejiang University, 2003, 29 (1): 49-54				2003
						+									Herbicide Resistant Transgenic Rice(Oryza sativa L.) Transformed by Pollen-tube Pathway Method and Its Inheritance								花粉管介导的转bar基因水稻植株的获得及其遗传	China Biotechnology, 2003, 23 (8): 92-95				2003
	+	+	+		+					Wx5’UTR	Antisense Wx				Transformation of the antisense waxy gene into the conventional indica rice varieties								反义Wx基因导入我国常规籼稻品种的研究	Journal of Yangzhou University:Agricultural and Life Science Edition, 2003, 24 (3)				2003
	+	+				+				sb401	P-19Z				Improving nutritional quality of rice seeds by lysine-rich protein gene								导入高赖氨酸蛋白质基因改良水稻种子的营养品质	Journal of Agricultural Biotechnology, 2004, 12 (4): 363-368				2003
	+	+								sb401	kna	P-19Z			Improving nutritional quality of rice seeds by lysine-rich protein gene									Journal of Agricultural Biotechnology, 2004, 12 (4): 363-368
										Glu	sb401	kna			Improving nutritional quality of rice seeds by lysine-rich protein gene									Journal of Agricultural Biotechnology, 2004, 12 (4): 363-368
	+	+	+		+					Tid					Tid Gene Transformation Rice Plants and the Plants Insect-resistant								Tid基因对水稻的转化及转基因植株的抗虫性	High Technology Letters, 2003, 13 (5): 33-37				2003
		+			+					232wx	Antisense Wx				Antisense Wx Gene Insertion into Maintainer Lines of Indica Hybrid Rice Results in Amylose Content Reducing								反义wx基因导入杂交籼稻保持系	Acta Agronomica Sinica, 2005, 31 (7): 876-881				2003
	+		+				+			PinII 3'	PinII				Studies on transforming high efficiency insect-resistant gene PinII into rice								高效抗虫基因PinII 转化水稻的研究	Southwest China Journal of Agricultural Sciences, 2003, 16 (4): 27-32				2003
		+	+							Antisense Wx	232wx				Transgenic Rice with Markerless Antisense Rice Waxy Gene Obtained by Agrobacterium-mediated Co-Transformation								通过根癌农杆菌介导的共转化获得具有蜡质基因反义片段的转基因水稻	Journal of Plant Physiology and Molecular Biology, 2003, 29 (6): 569-575				2003
	+	+	+							GO					Introducing Glucose Oxidase Gene into Rice Mediated by Agrobacterium tumefaciens								由根瘤农甘菌介导将葡萄糖氧化酶基因转入水稻	Master Dissertation, Chinese Academy of Sciences, 2002				2003
			+		+					xa21					Breeding and field performance of Xa21 transgenic japonica variety Shengdao301								转Xa21基因圣稻301的培育及其田问表现	Shandong Agricultural Sciences, 2003 (6): 10-11				2003
	+	+								AGLU	RCH10				Transgenic Rice with Double Defense Genes Exhibiting Resistance to Sheath Blight (Rhizoctonia solani Kuhn.)								转化双价防卫基因获得抗纹枯病水稻	Journal of Plant Physiology and Molecular Biology, 2003, 29 (4): 322-326				2003
			+							Xa21					Studies on Production of Transgenic Plants Expressing Xa21 Gene mediated by Agrobacterium tumefaciens and its Inheritance in Rice								农杆菌介导籼稻Xa21基因的转化及其遗传研究	Acta Agriculturae Universitat is Jiang xiensis, 2003, 25 (3)				2003
	+	+	+							sss					Induction of soluble starch synthase gene into Indica Staiva L. by Agrobacterium-mediated transformation								农杆菌介导法获得转可溶性淀粉合成酶基因籼稻	Fujian Journal of Agricultural Sciences, 2003, 18 (2): 65-68				2003
	+	+	+	+			+			sbk					Obtaining transgenic photoperiod-temperature sensitive genic male sterile line containing modified Cpti (sck) and Bt (sbk)								水稻抗虫转基因光温敏核不育系植株的获得	Chinese Journal of Applied and Environmental Biology, 2003, 9 (3): 246-249				2003
	+	+				+	+			Pin	rbcS	cecropinB			Cotransformation of Rice by bar and cecropin B Gene Expression Cassettes Lacking Vector Backbone Sequences								无载体主干序列的bar和cecropin B 基因表达框共转化水稻	Acta Genetica Sinica, 2003, 30 (2): 135-141				2003
	+	+	+	+						cry1Ac					Obtaining Stem Borer-resistant Homozygous Transgenic Lines of Minghui 81 Harboring Novel cry1Ac Gene via Particle Bombardment								修饰的cry1Ac 基因导入籼稻明恢81 获得抗虫纯合系	Acta Genetica Sinica, 2002, 29 (6): 519-524				2002
	+	+	+		+					232wx	Antisense Wx				Optimization of Agrobacterium-Mediated Transformation of Rice and Regeneration of Transgenic Plants with Antisense Waxy Gene								根癌农杆菌介导的水稻转化系统的优化及转反义wx 基因植株的获得	Chinese Jouranl of Rice Science, 2002, 16 (4): 304-310				2002
	+	+				+	+			pinⅡ’5	pinⅡ	pinⅡ’3			The Inherience and Expression of bar、pinⅡ Gene in Transgenic Rice (Oryza Sative L.)								bar、pinⅡ基因在转基因水稻中的遗传与表达	Master Dissertation, Zhejiang University, 2002				2002
	+									OCS	CED-9				Study on Genetic Transformation of Anti-Apoptosis Gene CED-9 to Tobacco and Rice								凋亡抑制基因CED-9转化烟草和水稻的研究	Master Dissertation, Zhejiang University, 2002				2002
			+		+		+			xa21	cry1Ab				Obtaining of Transgenic Rice Plants Resistant to both Stem Borer and Bacterial								利用Bt基因和Xa21基因转化获得抗螟虫白叶枯病的转基因水稻	Acta Agronomica Sinica, 2002, 28 (6): 857-860				2002
	+	+	+							CPTI	cry1Ac				Blight Disease from Bt and Xa21 Genes Transforming								利用Cry1Ac和CpTI双价基因及组织特异启动子增强转基因水稻对螟虫的抗性	Doctoral Dissertation, Zhejiang University, 2002				2002
						+									Expression Analysis of Rice bar Gene Mediated Matrix Attachment Region (MAR) Sequence Transformed by a Gene Bombardment								基因枪转化Mar 序列介导水稻Bar 基因的表达分析	Journal of Agricultural Biotechnology, 2002, 10 (3): 227-230				2002
	+	+				+				pinII 5’	pinII	pinII3’			Studies on culture of insect-resistant rice by transforming rice with PINⅡ gene via the pollen-tube pathway								pinII基因通过花粉管通道法转化水稻的研究	Journal of Hubei University (Natural Science Edition), 2002, 2 (3): 259-262				2002
										G11/Gt1	glgC-TM	AGP			Transformation of glgC-TM Gene into Rice Mediated by Agrobacterium								农杆菌介导glgC-TM基因转化水稻研究	Chinese Journal of Rice Science, 2002, 16 (2): 129-133				2002
			+							gutD					Study on the Transformation of Rice(Oryza sativaL. )With GutD Gene								6－磷酸山梨醇脱氢酶基因转化水稻研究	Bulletin of Science and Technology, 2002, 18 (6): 441-445				2002
	+	+	+		+					TchiB					Construction of a New Plant Transformation Plasmid pBG1121 Containing a Tobacco Chitinase Gene and Rice Transformation								含烟草几丁质酶基因的质粒pBG1121的构建及水稻转化	Journal of Hunan Agricultural University (Natural Sciences), 2002, 28 (2): 93-96				2002
	+	+		+		+				sck					Microprojectile-mediated Transformation of Herbicide Resistance Gene in Restoring Line of Japonica Rice and Its Expreesing in Transgenic Plant								抗除草剂基因在粳稻恢复系中的基因枪转化及其在后代中的表达	Tianjin Agricultural Sciences, 2002, 8 (1): 1-6				2002
					+										Obtaining of transgenic rice plants with antifungal r-thionin Rs-afp1 gene mediated by agrobacterium								农杆菌介导将抗真菌r_硫堇蛋白Rs_afp1基因导入水稻获得转基因植株	Shandong Agricultural Sciences, 2002, (3): 20-21				2002
			+	+						Mas	GNA				Obtaining Transgenic Elite Indica Restorer Line and Study on Genetic Stability of Transgenes								转抗虫基因优良籼型恢复系的获得及其外源基因的遗传稳定性研究	Chinese Journal of Rice Science , 2002, 6 (3): 211-215				2002
			+				+			P-mas	CpTI				Obtaining Fertile Transgenic Plants of Resistant-insect Rice (Oryza sativa L.) via Particle Bombardment								基因枪法转化水稻获得可育的转抗虫基因水稻再生植株	High Technology Letters, 2001, 11 (2): 20-21				2001
	+		+		+					Xa21					Production of transgenic rice in a wide compatibility restore line with xa21 gene								Xa21基因导入水稻广亲和恢复系SWR20 的研究	Jiangsu Agriculture Research, 2001, 22 (2): 7-12				2001
			+		+					Xa21					Introduction of bacterial blight resistance gene xa21 and molecular detection in transgenic rice								Xa21基因导入水稻及转基因植株的鉴定	Chinese Journal of Applied and Environmental Biology, 2001, 7 (3): 228-231				2001
			+												Novel Transgenic Rice Strains Resistant to Blast and Sheath Blight								抗稻瘟病和纹枯病的转基因水稻新品系	Acta Scientiarum Naturalium Universitatis Sunyatseni, 2001, 40 (3): 131-132				2001
	+	+	+		+					ap1					Production of Transgenic Rice Containing apl Gene Encoding a Ferredoxin-like Amphipathic Protein from Sweet Pepper								含编码类铁氧还双亲性蛋白ap1基因的转基因水稻植株的获得	Journal of Fudan University (Natural Science), 2001, 40 (1): 112-116				2001
	+	+				+			+	TA29					A study on the transferring engineered male sterile gene into rice via Agrobacterium Tumeiens co-cultivation								用农杆菌共培养法将雄性不育基因导入水稻的研究	Southwest China Journal of Agricultural Sciences, 2001,14 (1): 13-15				2001
	+	+	+	+	+					lys					Transfer of Lysine-rich Protein Gene into Rice and Production of Fertile Transgenic Plants								高赖氨酸蛋白基因导入水稻及可育转基因植株的获得	Acta Botanica Sinica, 2001, 43 (5): 506-511				2001
	+	+	+				+			RAC22	RCH10	RC24			Production of Rice Plants Containing Multiple Transgenes								转多基因水稻植株的获得	Plant Physiology Journal, 2001, 43 (5): 506-511				2001
	+									AGPase（腺嘌呤二磷酸葡萄糖焦磷酸化酶）基因	Gt15'	HM			Studies on Transgenic Rice(Oryza sativa L.)Plants Transformed with AGPase Gene and Its Economic Characters								导入AGPase 基因的转基因可育水稻及其经济性状的研究	Acta Agriculturae Boreali-Sinica, 2001,16 (4): 11-14				2001
	+	+				+	+			pin2	pRC24	B-RIP	bt		Construction of plant expression vectors containing multiple genes								多基因植物表达载体的构建	Acta Botanica Boreali-Occidentalia Sinica, 2001, 21(4): 609-614				2001
	+	+	+	+	+					lectin					Transformation of Pea Lectin Gene and Parasponia HaemoglobinGene into Rice and Their Expressions								豌豆凝集素和血红蛋白基因对水稻的转化和表达	Acta Botanica Sinica, 2001, 43 (3): 267-274				2001
	+	+	+							Gt1	Gly1				Introduction of soybean glycinin gene into rice (Oryza sativa L. ) with Agrobacterium-mediated trans-formation.								用农杆菌介导法将大豆球蛋白基因导入水稻	Journal of Zhejiang University, 2001, 27(5): 495-499,				2001
	+	+			+			+	+	TCS					Trichosanthes Kirilowii Thichosanthin Confers to Resistance to Rice Stem Borers and Rice Planthopper in Transgenic Rice								天花粉蛋白基因在水稻中转化及抗虫研究	High Technology Letters, 2000, 10 (5): 8-10				2000
	+	+	+							ThEn-42					Enhance Disease Resistance of Transgenic Rice Plants with an Endochitinase Gene ThEn-42 from Trichoderma harzianum								哈茨木霉几丁质酶基因提高水稻抗病性研究	Journal of Yunnan Agricultural University, 2000, 15 (3): 212-215				2000
	+	+				+	+			Bt	pinII 5’	pinII3’	SBTi		Research on Improving Rice Resistance to the Pest by B.t. and SBTi Genes								应用B．t．和SBTi基因提高水稻抗虫性的研究	Chinese Journal of Biotechnology, 2000, 16 (5): 603-608				2000
	+		+					+		Gt1	Tet	GLgc_TM			Agrobacterium-mediated transformation of ADP-glucose pyrophosphorylase gene in rice,Oryza sativa								农杆菌介导的GLgc_TM_基因在水稻中的遗传转化	Southwest China Journal of Agricultural Sciences, 2000, 13 (1): 129-133				2000
		+							+	IPT	SAG12				A Senescence-inhibition Chimeric Gene was Transferrd into Rice by the Biolistic Method and Expressed								水稻中抑制衰老的嵌合基因的基因枪转化和表达分析	Journal of Agricultural Biotechnology, 1999, 7 (1): 17-22				1999
		+				+									Transgenic herbicide-resistant rice produced with spermary introduction								花粉管导入法培育抗除草剂的转基因水稻	Journal o f Shanghai Ag ricultural College, 1999, 17 (4): 237 -241				1999
		+					+			RC24	Glu				Enhancement of rice disease resistance by two antifungal protein genes								使用双抗真菌蛋白基因提高水稻抗病性的研究	Plant Physiology Journal, 1991, 41 (11): 1187-1191				1999
	+	+				+	+			cry1A(b)	Pin 5'	Pin	Pin 3'		Production of Insect-resistant Rice Plants Transformed With cryIA(b)and pinII Genes								用两个抗虫基因分别转化水稻及抗虫株系的获得	Journal of Agricultural Biotechnology, 1999, 7 (3): 259-266				1999
		+					+			pRC24	B-RIP	Glu			Introduction of Multiple Antifungal Protein Genes into Rice and Preliminary Study on Resistance toPyricularia oryzaeof Transgenic Rices								转多个抗真菌蛋白基因水稻植株的获得及其抗稻瘟病菌的初步研究	Acta Scientiarum Naturalium Universitatis Sunyatseni, 1999, 38 (4): 62				1999
	+	+				+				cecropin B	Pin 3'	rbcS			Transfer of cecropin b gene into rice (oryza satival.) by the biolistic method and transgenic progeny line for resistance to bacterial blight								应用基因枪将蚕抗菌肽基因导入水稻获抗白叶枯病株系	Journal of South China Agricultural University,1991, 18 (4): 1-7				1997
	+		+	+	+				+	cry1Ab					Development of TransgenicBacillus thuriengiensisR ice Resistant to Rice Stem Borers and Leaf Folders								转基因水稻“克螟稻”选育	Jou rnal of Zhejiang Agricul tural University, 1998, 24 (6): 579-580				1998
	+									CP					Resistance t oRice StriPe Virus conferred by expression of coat protein in transgenic indica rice plants regenerated from bombarded suspension culture								悬浮细胞再生表达外壳蛋白的转基因Indica水稻对水稻条纹病毒的抗病性_英文_	Virologica Sinica, 1997, 12 (3): 261-268				1997
	+	+				+	+			cecropin B	Pin 3'				Production and identification of transgenic plant cecropin B gene								转抗菌肽B基因水稻植株的获得与鉴定	High Technology Letters, 1996, (5): 4-6				1996
	+	+				+	+			Bt					Production of Herbieide-Ressitant Transgenic Plants from Rice Wide Compatibility Cultivar“02428”								水稻广亲和品种_02428_抗除草剂转基因植株的获得	Journal of Agricultural Biotechnology, 1994, 2 (2): 33-38				1994
	+	+			+			+	+						Transgenic Rice Plants Produced By Direct Uptake Of Endotoxin Protein Gene From Bacillus thuringenesis into Rice Protoplasts								苏云金芽孢杆菌_内毒素基因导入水稻原生质体后获得转基因植株	Scientia Agricultura Sinica, 1989, 22 (6): 1-5				1989
		+					+			Cry1Ab/Ac					Characterization of the transgenic rice event TT51–1 and construction of a reference plasmid.									Journal of agricultural and food chemistry, 59 (16), 8550-8559.
	+	+	+	+						SCK	Cry1Ac				Integrated structure and event-specific real-time detection of transgenic cry1Ac/SCK rice Kefeng 6.									European Food Research and Technology, 2011, 232 (2), 351-359.
		+		+			+			Cry1Ac	CpTi				Event-specific qualitative and quantitative detection of transgenic rice Kefeng-8 by characterization of the transgene flanking sequence.									European Food Research and Technology, 2012, 234 (3), 477-484.
	+	+	+	+	+			+	+	Cry1Ab					Transgenic rice plants with a synthetic cry1Ab gene from Bacillus thuringiensis were highly resistant to eight lepidopteran rice pest species.									Molecular Breeding, 2000, 6 (4): 433-439.
Total	181	164	125	71	65	42	26	12	22
